# Supplementary material
Source: Springer Nature journal article supplement (https://www.springermedizin.de/resource/supplementary/13024_2011_329_MOESM14_ESM.pdf/9643764)

**A**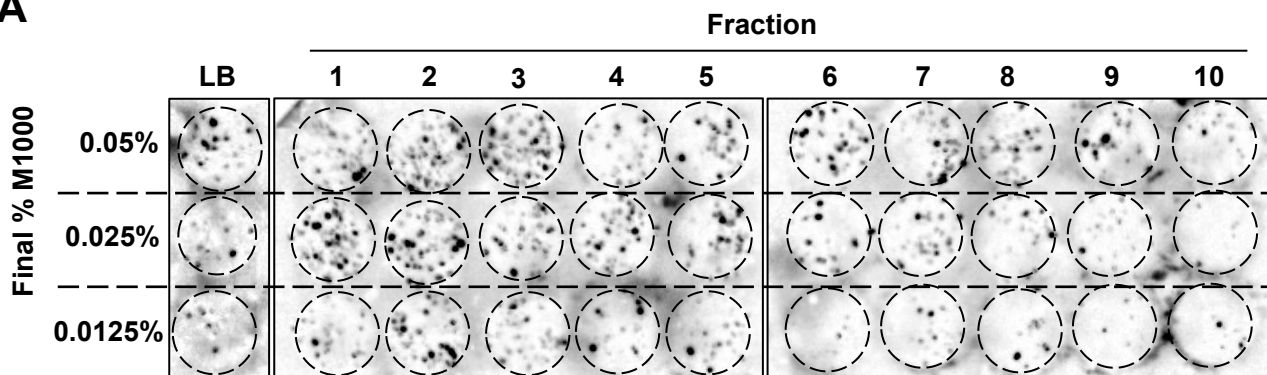**B**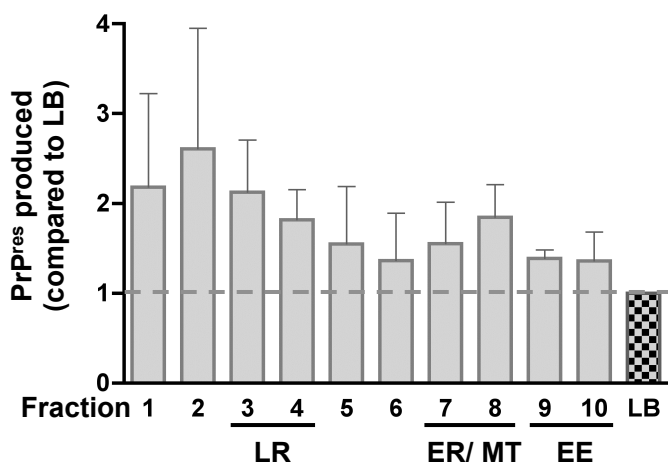**C**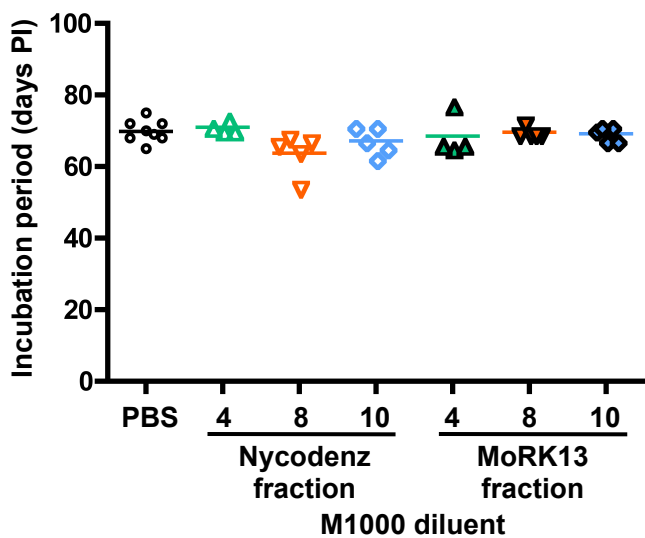

Supplement: MOESM14 [file 9643764]
